# Supplementary material for: Red blood cell distribution width in different time-points of peripheral thrombolysis period in acute ischemic stroke is associated with prognosis
Source: PubMed Central journal article supplement (PMC9365566; doi:10.18632/aging.204174), 2022-07-13
Supplement: aging-14-204174-s001.pdf [file aging-14-204174-s001.pdf]

**SUPPLEMENTARY FIGURES**

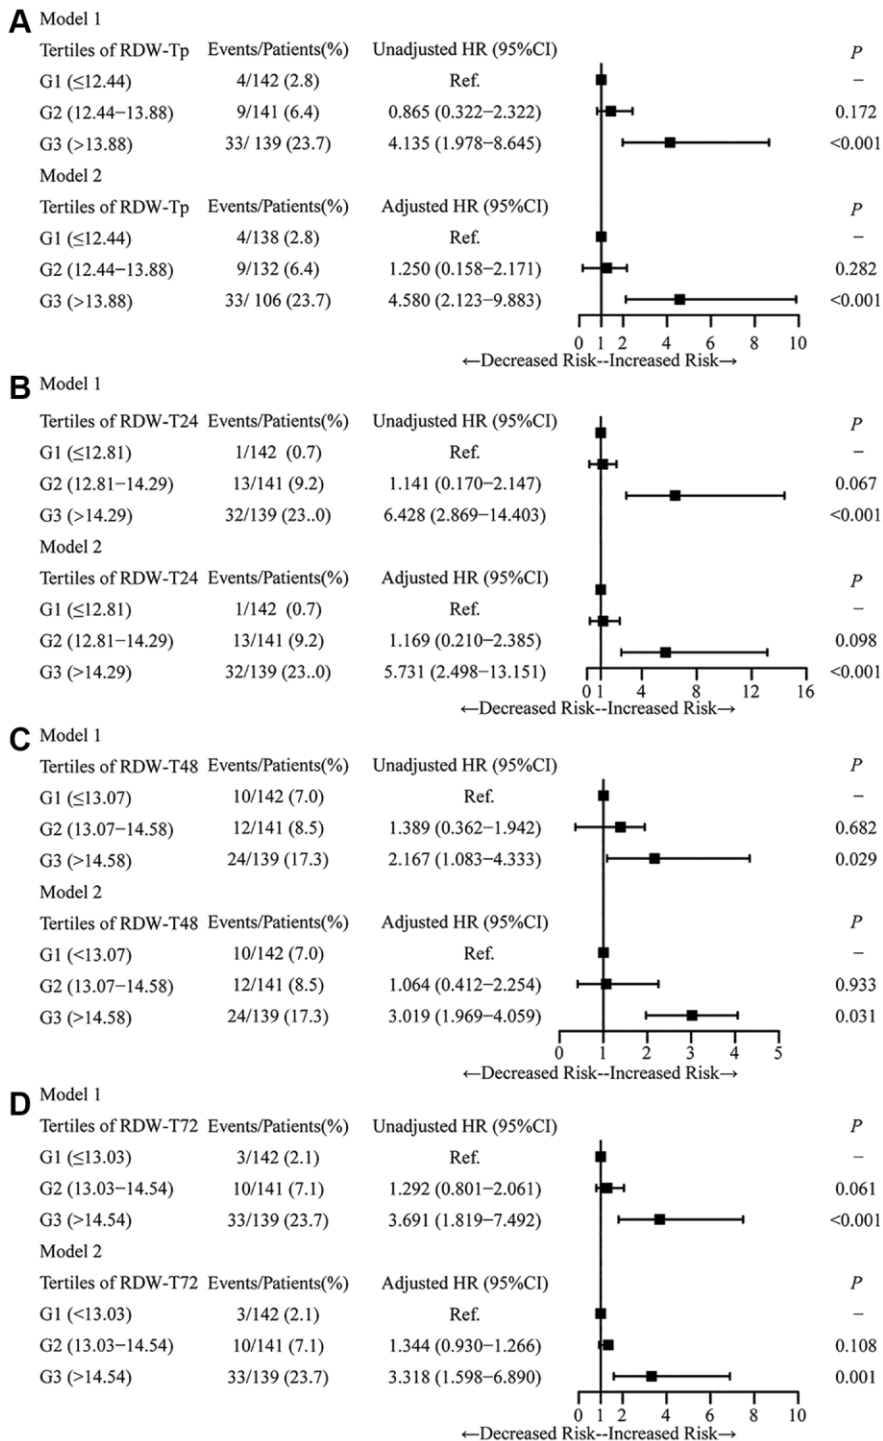

**Supplementary Figure 1. Association of RDW levels in different time-points of peripheral thrombolysis period and stroke outcomes.** Cox regression analysis demonstrating the relationship between RDW levels in Tp (A), T24 (B), T48 (C), T72 (D) and recurrent stroke within 3 months after thrombolysis.

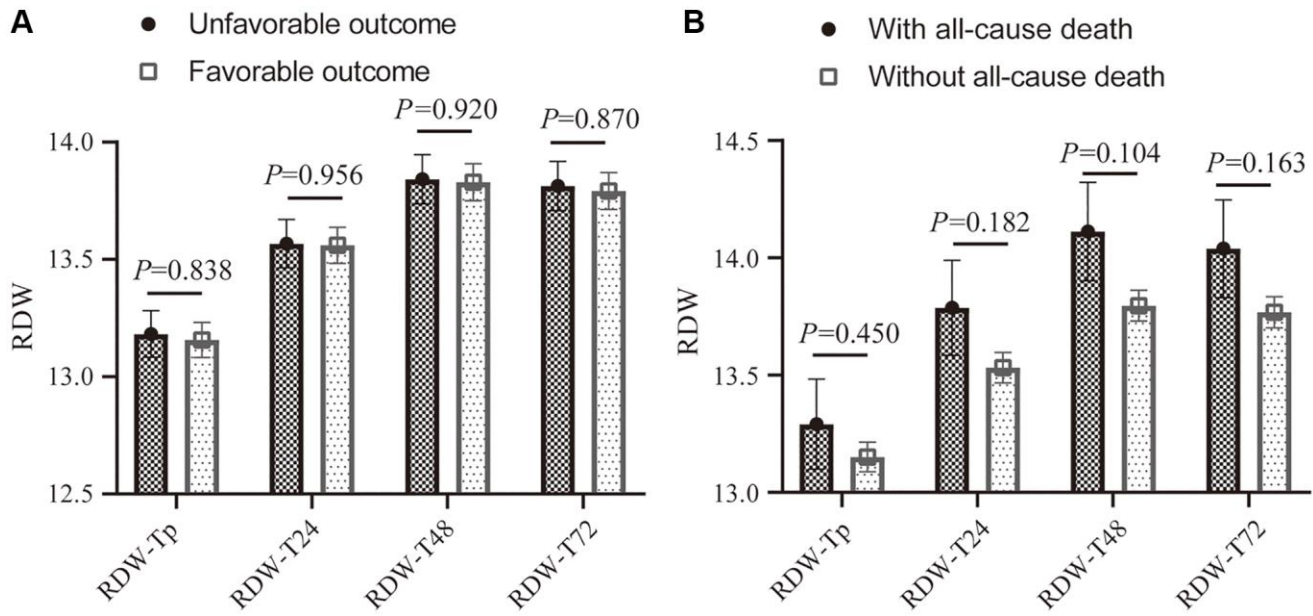

**Supplementary Figure 2. The sample RDW profiles with 95% CI in different time-points of peripheral thrombolysis period according to patients with unfavorable outcome and favorable outcome from onset to 7 days after thrombolysis, or patients with all cause death appear and all cause death disappear within 3 months. (A) Comparison of RDW levels in different time-points of peripheral thrombolysis period in patients with unfavorable outcome (black) and favorable outcome (gray). (B) Comparison of RDW levels in different time-points of peripheral thrombolysis period in patients with all cause death appear (black) and all cause death disappear (gray). Abbreviations: RDW: red blood cell distribution width; CI: confidence interval.**

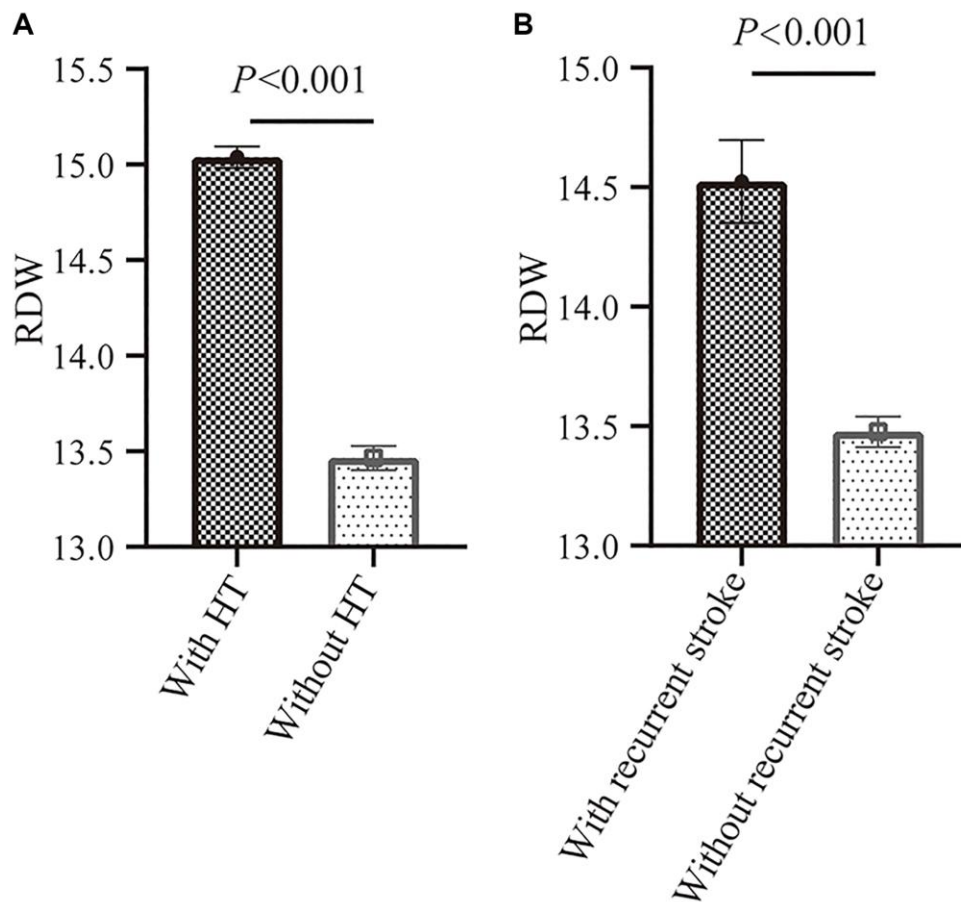

**Supplementary Figure 3. The sample mean profiles of RDW with 95% CI according to patients with HT appear and HT disappear from onset to 7 days after thrombolysis, or patients with recurrent stroke and without recurrent stroke within 3 months. (A) Comparison of mean RDW levels in different time-points of peripheral thrombolysis period in AIS patients with HT appear (black) and HT disappear (gray). (B) Comparison of mean RDW levels in different time-points of peripheral thrombolysis period in AIS patients with recurrent stroke appear (black) and recurrent stroke disappear (gray). Abbreviations: RDW: red blood cell distribution width; CI: confidence interval; HT: hemorrhagic transformation.**
