# Supplementary material for: Red blood cell distribution width in different time-points of peripheral thrombolysis period in acute ischemic stroke is associated with prognosis
Source: PubMed Central journal article supplement (PMC9365566; doi:10.18632/aging.204174), 2022-07-13
Supplement: aging-14-204174-s002.pdf [file aging-14-204174-s002.pdf]

## SUPPLEMENTARY TABLES

**Supplementary Table 1. Univariate logistic regression to predict HT of AIS patients treated with IVT.**

| Characteristics          | OR (95% CI)         | P      |
|--------------------------|---------------------|--------|
| Male                     | 0.754 (0.369–1.540) | 0.438  |
| Age, years               | 1.015 (0.982–1.049) | 0.372  |
| BMI, kg/m <sup>2</sup>   | 1.020 (0.912–1.140) | 0.734  |
| Vascular risk factors    |                     |        |
| Hypertension             | 1.194 (0.574–2.482) | 0.636  |
| Diabetes mellitus        | 2.982 (1.401–6.346) | 0.005  |
| Atrial fibrillation      | 1.390 (0.579–3.334) | 0.461  |
| Vascular heart disease   | 0.810 (0.103–6.350) | 0.841  |
| Coronary atherosclerosis | 0.901 (0.305–2.667) | 0.851  |
| Smoking                  | 1.457 (0.721–2.946) | 0.294  |
| Drinking                 | 0.933 (0.422–2.064) | 0.865  |
| IAS                      |                     | 0.014  |
| Mild stenosis            | 0.869 (0.232–3.251) | 0.834  |
| Moderate stenosis        | 3.449 (1.288–9.232) | 0.014  |
| Severe stenosis          | 3.076 (1.296–7.296) | 0.011  |
| Long-term medication     |                     |        |
| Hypoglycemic             | 3.645 (1.666–7.975) | 0.001  |
| Lipid-lowering           | 0.481 (0.063–3.675) | 0.480  |
| Antiplatelet             | 0.000 (0.00–)       | 0.998  |
| Anticoagulant            | 0.810 (0.103–6.350) | 0.841  |
| Antihypertensive         | 1.214 (0.601–2.452) | 0.589  |
| TOAST classification     |                     |        |
| Arteriolar occlusive     | 0.274 (0.124–0.604) | 0.001  |
| NIHSS score              | 1.084 (1.026–1.146) | 0.004  |
| SBP adm (mmHg)           | 1.028 (1.013–1.043) | <0.001 |
| DBP adm (mmHg)           | 1.048 (1.023–1.073) | <0.001 |

Abbreviations: BMI: body mass index; BP: blood pressure; DBP adm: diastolic blood pressure-admission; IAS: intracranial arterial stenosis; NIHSS: National Institute of Health Stroke Scale; SBP adm: systolic blood pressure-admission; SD: standard deviation.

**Supplementary Table 2. Univariate COX regression to predict stroke outcomes of AIS patients treated with IVT.**

| Characteristics        | Primary outcome     |       | Secondary outcome   |       |
|------------------------|---------------------|-------|---------------------|-------|
|                        | HR (95% CI)         | P     | HR (95% CI)         | P     |
| Male                   | 0.834 (0.461–1.508) | 0.548 | 0.827 (0.472–1.451) | 0.509 |
| Age, years             | 1.022 (0.994–1.050) | 0.127 | 1.049 (1.019–1.079) | 0.001 |
| BMI, kg/m <sup>2</sup> | 1.017 (0.927–1.115) | 0.725 | 0.944 (0.862–1.032) | 0.206 |
| Vascular risk factors  |                     |       |                     |       |
| Hypertension           | 1.223 (0.667–2.244) | 0.515 | 1.193 (0.672–2.118) | 0.548 |

|                          |                     |        |                      |        |
|--------------------------|---------------------|--------|----------------------|--------|
| Diabetes mellitus        | 2.254 (1.203–4.225) | 0.011  | 1.706 (0.909–3.203)  | 0.096  |
| Atrial fibrillation      | 1.110 (0.518–2.380) | 0.788  | 3.125 (1.759–5.551)  | <0.001 |
| Vascular heart disease   | 0.597 (0.082–4.331) | 0.610  | 0.047 (0.000–28.491) | 0.350  |
| Coronary atherosclerosis | 1.441 (0.672–3.088) | 0.348  | 2.139 (1.120–4.086)  | 0.021  |
| Smoking                  | 1.483 (0.831–2.644) | 0.182  | 0.861 (0.485–1.529)  | 0.609  |
| Drinking                 | 1.016 (0.535–1.930) | 0.961  | 0.891 (0.474–1.672)  | 0.718  |
| IAS                      |                     | <0.001 |                      | <0.001 |
| Mild stenosis            | 0.579 (0.168–2.001) | 0.388  | 1.135 (0.405–3.184)  | 0.810  |
| Moderate stenosis        | 3.948 (1.905–8.182) | <0.001 | 2.414 (1.001–5.825)  | 0.050  |
| Severe stenosis          | 2.119 (1.023–4.390) | 0.043  | 4.670 (2.388–9.132)  | <0.001 |
| Long-term medication     |                     |        |                      |        |
| Hypoglycemic             | 2.775 (1.460–5.273) | 0.002  | 2.357 (1.255–4.424)  | 0.008  |
| Lipid-lowering           | 0.745 (0.181–3.075) | 0.684  | 1.187 (0.722–4.573)  | 0.205  |
| Antiplatelet             | 0.463 (0.112–1.911) | 0.287  | 1.173 (0.466–2.952)  | 0.735  |
| Anticoagulant            | 0.601 (0.083–4.358) | 0.614  | 1.784 (0.556–5.729)  | 0.331  |
| Antihypertensive         | 1.244 (0.697–2.218) | 0.460  | 0.859 (0.489–1.506)  | 0.595  |
| TOAST classification     |                     | 0.014  |                      | <0.001 |
| Arteriolar occlusive     | 0.399 (0.215–0.742) | 0.004  | 0.168 (0.078–0.360)  | <0.001 |
| Cardiogenic              | 0.165 (0.022–1.209) | 0.076  | 0.890 (0.376–2.110)  | 0.792  |
| NIHSS score              | 1.064 (1.013–1.117) | 0.013  | 1.109 (1.067–1.154)  | <0.001 |
| SBP adm (mmHg)           | 1.028 (1.016–1.040) | <0.001 | 0.998 (0.986–1.009)  | 0.676  |
| DBP adm (mmHg)           | 1.040 (1.021–1.059) | <0.001 | 1.012 (0.993–1.031)  | 0.230  |

Abbreviations: BMI: body mass index; BP: blood pressure; DBP adm: diastolic blood pressure-admission; IAS: intracranial arterial stenosis; NIHSS: National Institute of Health Stroke Scale; SBP adm: systolic blood pressure-admission; SD: standard deviation.

**Supplementary Table 3. Regression analysis demonstrating the relationship between RDW tertiles in the time-points and neurological improvement and all-cause death.**

| Tertiles of RDW-Tp  | Neurological improvement |       | All-cause death        |       |
|---------------------|--------------------------|-------|------------------------|-------|
|                     | Unadjusted OR (95% CI)   | P     | Unadjusted HR (95% CI) | P     |
| G1 (≤12.44)         | –                        | –     | –                      | –     |
| G2 (12.44–13.88)    | 1.282 (0.795–2.067)      | 0.308 | 0.922 (0.456–1.864)    | 0.820 |
| G3 (>13.88)         | 0.894 (0.557–1.433)      | 0.641 | 1.280 (0.663–2.470)    | 0.462 |
| Tertiles of RDW-T24 | Unadjusted OR (95% CI)   | P     | Unadjusted HR (95% CI) | P     |
| G1 (≤12.81)         | –                        | –     | –                      | –     |
| G2 (12.81–14.29)    | 1.403 (0.869–2.265)      | 0.166 | 0.847 (0.403–1.779)    | 0.660 |
| G3 (>14.29)         | 0.894 (0.558–1.432)      | 0.640 | 1.600 (0.835–3.066)    | 0.157 |
| Tertiles of RDW-T48 | Unadjusted OR (95% CI)   | P     | Unadjusted HR (95% CI) | P     |
| G1 (≤13.07)         | –                        | –     | –                      | –     |
| G2 (13.07–14.58)    | 1.400 (0.869–2.258)      | 0.167 | 0.714 (0.328–1.555)    | 0.396 |
| G3 (>14.58)         | 0.975 (0.608–1.562)      | 0.915 | 1.756 (0.926–3.330)    | 0.085 |

| <b>Tertiles of RDW-T72</b> | <b>Unadjusted OR (95% CI)</b> | <b>P</b> | <b>Unadjusted HR (95% CI)</b> | <b>P</b> |
|----------------------------|-------------------------------|----------|-------------------------------|----------|
| G1 ( $\leq 13.03$ )        | –                             | –        | –                             | –        |
| G2 (13.03–14.54)           | 1.403 (0.869–2.265)           | 0.166    | 0.849 (0.404–1.784)           | 0.665    |
| G3 ( $> 14.54$ )           | 0.894 (0.558–1.432)           | 0.640    | 1.608 (0.839–3.082)           | 0.152    |

**Supplementary Table 4. Demographics of included patients grouped by median of mean RDW.**

| <b>Variables</b>                      | <b>Mean RDW&lt;13.60</b> | <b>Mean RDW<math>\geq</math>13.60</b> | <b>P</b> |
|---------------------------------------|--------------------------|---------------------------------------|----------|
| Male ( <i>n</i> , %)                  | 143 (67.5)               | 131 (62.4)                            | 0.275    |
| Age, years (mean (SD))                | 64.6 (11.7)              | 65.8 (10.3)                           | 0.268    |
| BMI, kg/m <sup>2</sup>                | 24.67 (3.22)             | 24.41 (3.03)                          | 0.380    |
| Height, cm                            | 167.4 (7.8)              | 166.0 (7.1)                           | 0.045    |
| Vascular risk factors ( <i>n</i> , %) |                          |                                       |          |
| Hypertension                          | 128 (60.4)               | 129 (61.4)                            | 0.825    |
| Diabetes mellitus                     | 36 (17.0)                | 36 (17.0)                             | 0.965    |
| Atrial fibrillation                   | 31 (14.6)                | 37 (17.6)                             | 0.403    |
| Vascular heart disease                | 5 (2.4)                  | 10 (4.8)                              | 0.182    |
| Coronary atherosclerosis              | 31 (14.6)                | 23 (11.0)                             | 0.259    |
| Smoking                               | 80 (37.7)                | 83 (39.5)                             | 0.706    |
| Drinking                              | 63 (29.7)                | 54 (25.7)                             | 0.358    |
| IAS ( <i>n</i> , %)                   |                          |                                       |          |
| No stenosis                           | 103 (48.6)               | 101 (48.1)                            |          |
| Mild stenosis                         | 40 (18.9)                | 30 (14.3)                             | 0.483    |
| Moderate stenosis                     | 23 (10.8)                | 30 (14.3)                             |          |
| Severe stenosis                       | 46 (21.7)                | 49 (23.3)                             |          |
| Long-term medication ( <i>n</i> , %)  |                          |                                       |          |
| Hypoglycemic                          | 26 (12.3)                | 30 (14.3)                             | 0.541    |
| Lipid-lowering                        | 17 (8.0)                 | 7 (3.3)                               | 0.038    |
| Antiplatelet                          | 27 (12.7)                | 9 (4.3)                               | 0.002    |
| Anticoagulant                         | 6 (2.9)                  | 9 (4.2)                               | 0.441    |
| Antihypertensive                      | 87 (41.0)                | 93 (44.3)                             | 0.500    |
| TOAST classification ( <i>n</i> , %)  |                          |                                       |          |
| Aortic atherosclerosis                | 82 (38.7)                | 96 (45.7)                             |          |
| Arteriolar occlusive                  | 111 (52.4)               | 99 (47.1)                             | 0.384    |
| Cardiogenic                           | 18 (8.5)                 | 15 (7.1)                              |          |
| Other causes and unknown reasons      | 1 (0.5)                  | 0 (0.0)                               |          |
| NIHSS score                           | 9.25 (5.92)              | 9.03 (5.94)                           | 0.695    |
| BP (mmHg)                             |                          |                                       |          |
| SBP adm                               | 157.26 (23.81)           | 158.50 (24.76)                        | 0.602    |
| DBP adm                               | 89.14 (13.15)            | 90.79 (15.06)                         | 0.233    |

Abbreviations: BMI: body mass index; BP: blood pressure; DBP adm: diastolic blood pressure-admission; IAS: intracranial arterial stenosis; ICAS: intracranial atherosclerotic stenosis; NIHSS: National Institute of Health Stroke Scale; SBP adm: systolic blood pressure-admission; SD: standard deviation.
